# Supplementary material
Source: HighWire-hosted journal article supplement (https://genome.cshlp.org/content/suppl/2003/08/13/1649303)

Brain tumor all

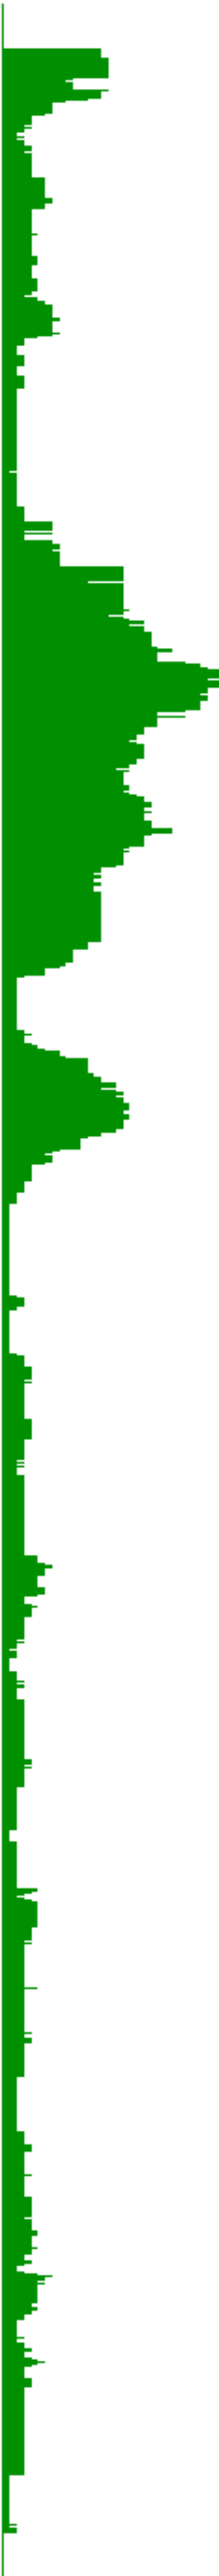

Breast tumor all

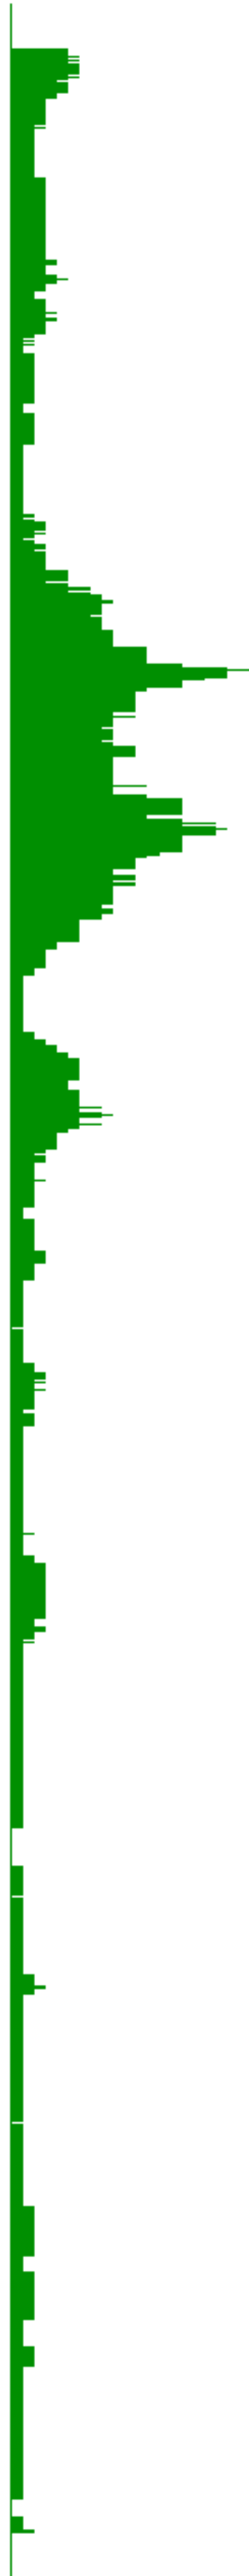

Prostate tumor all

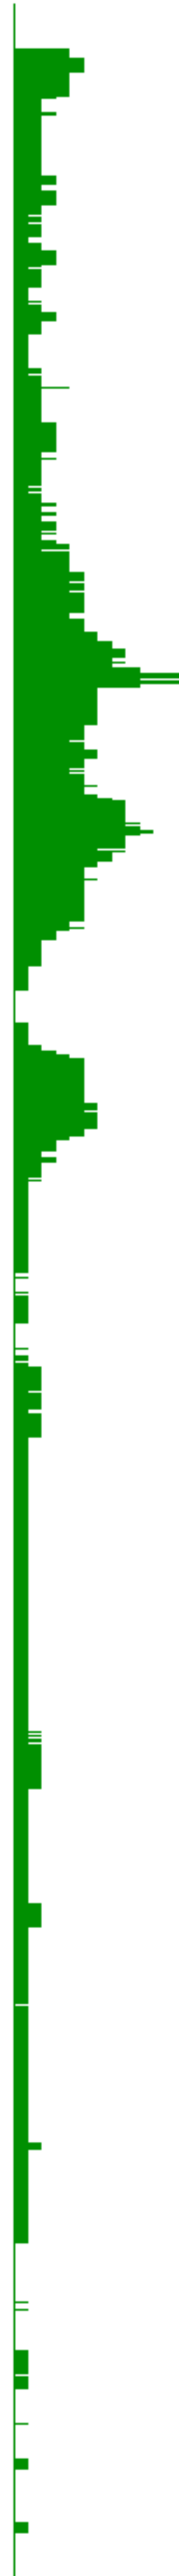

Colon tumor all

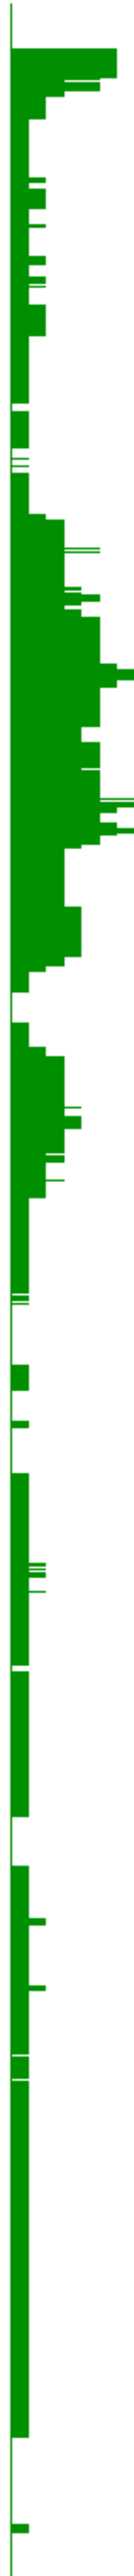

Ovary tumor all

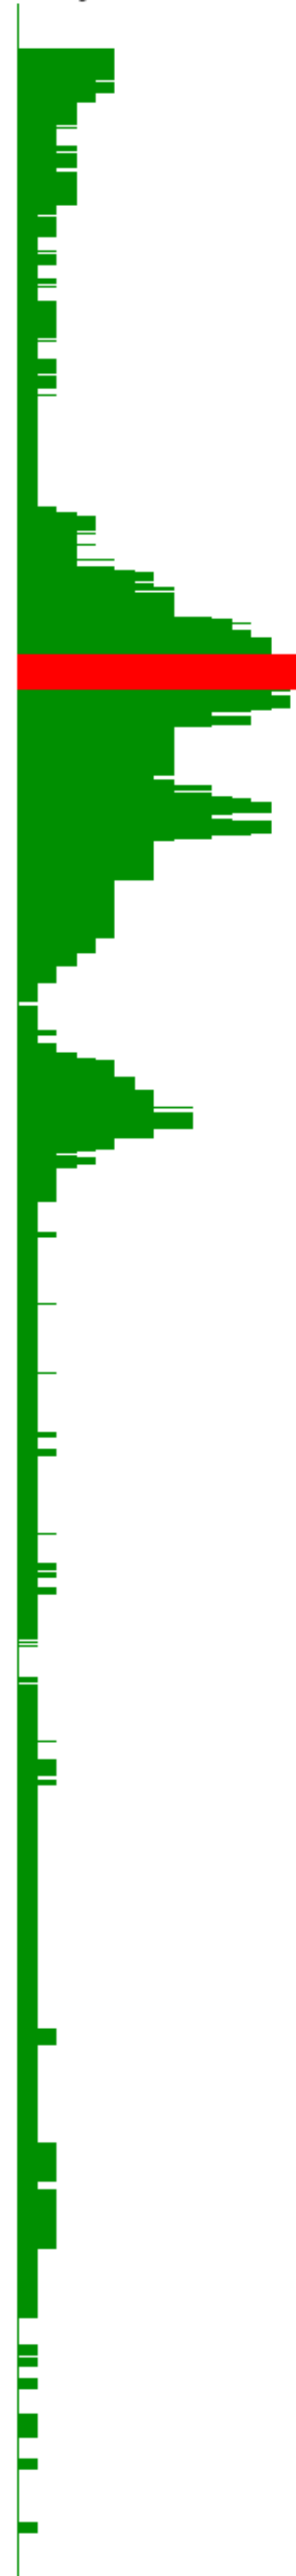

Brain normal

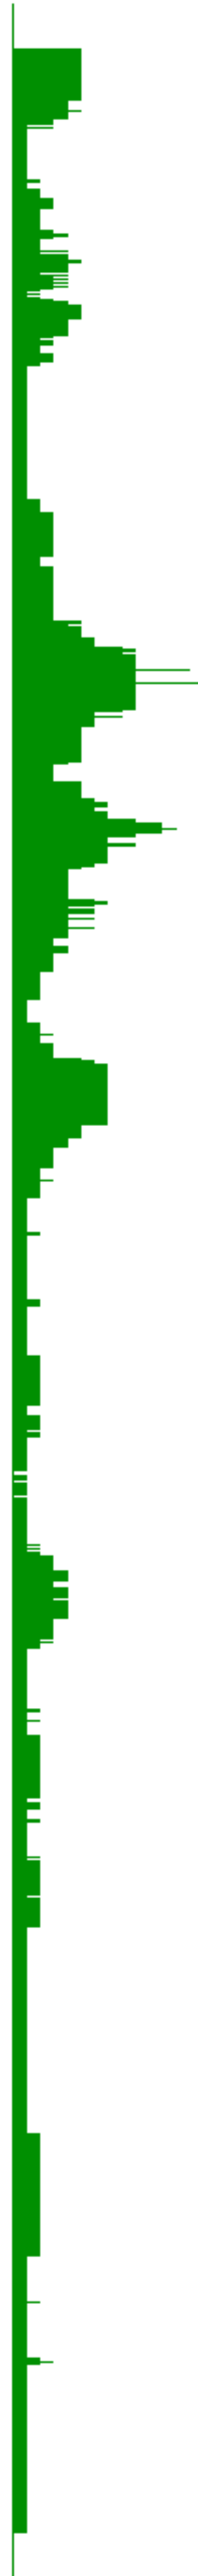

Supplement: Figure08.pdf [file Figure08.pdf]
