# Supplementary material
Source: HighWire-hosted journal article supplement (https://genome.cshlp.org/content/suppl/2003/08/13/1649303)

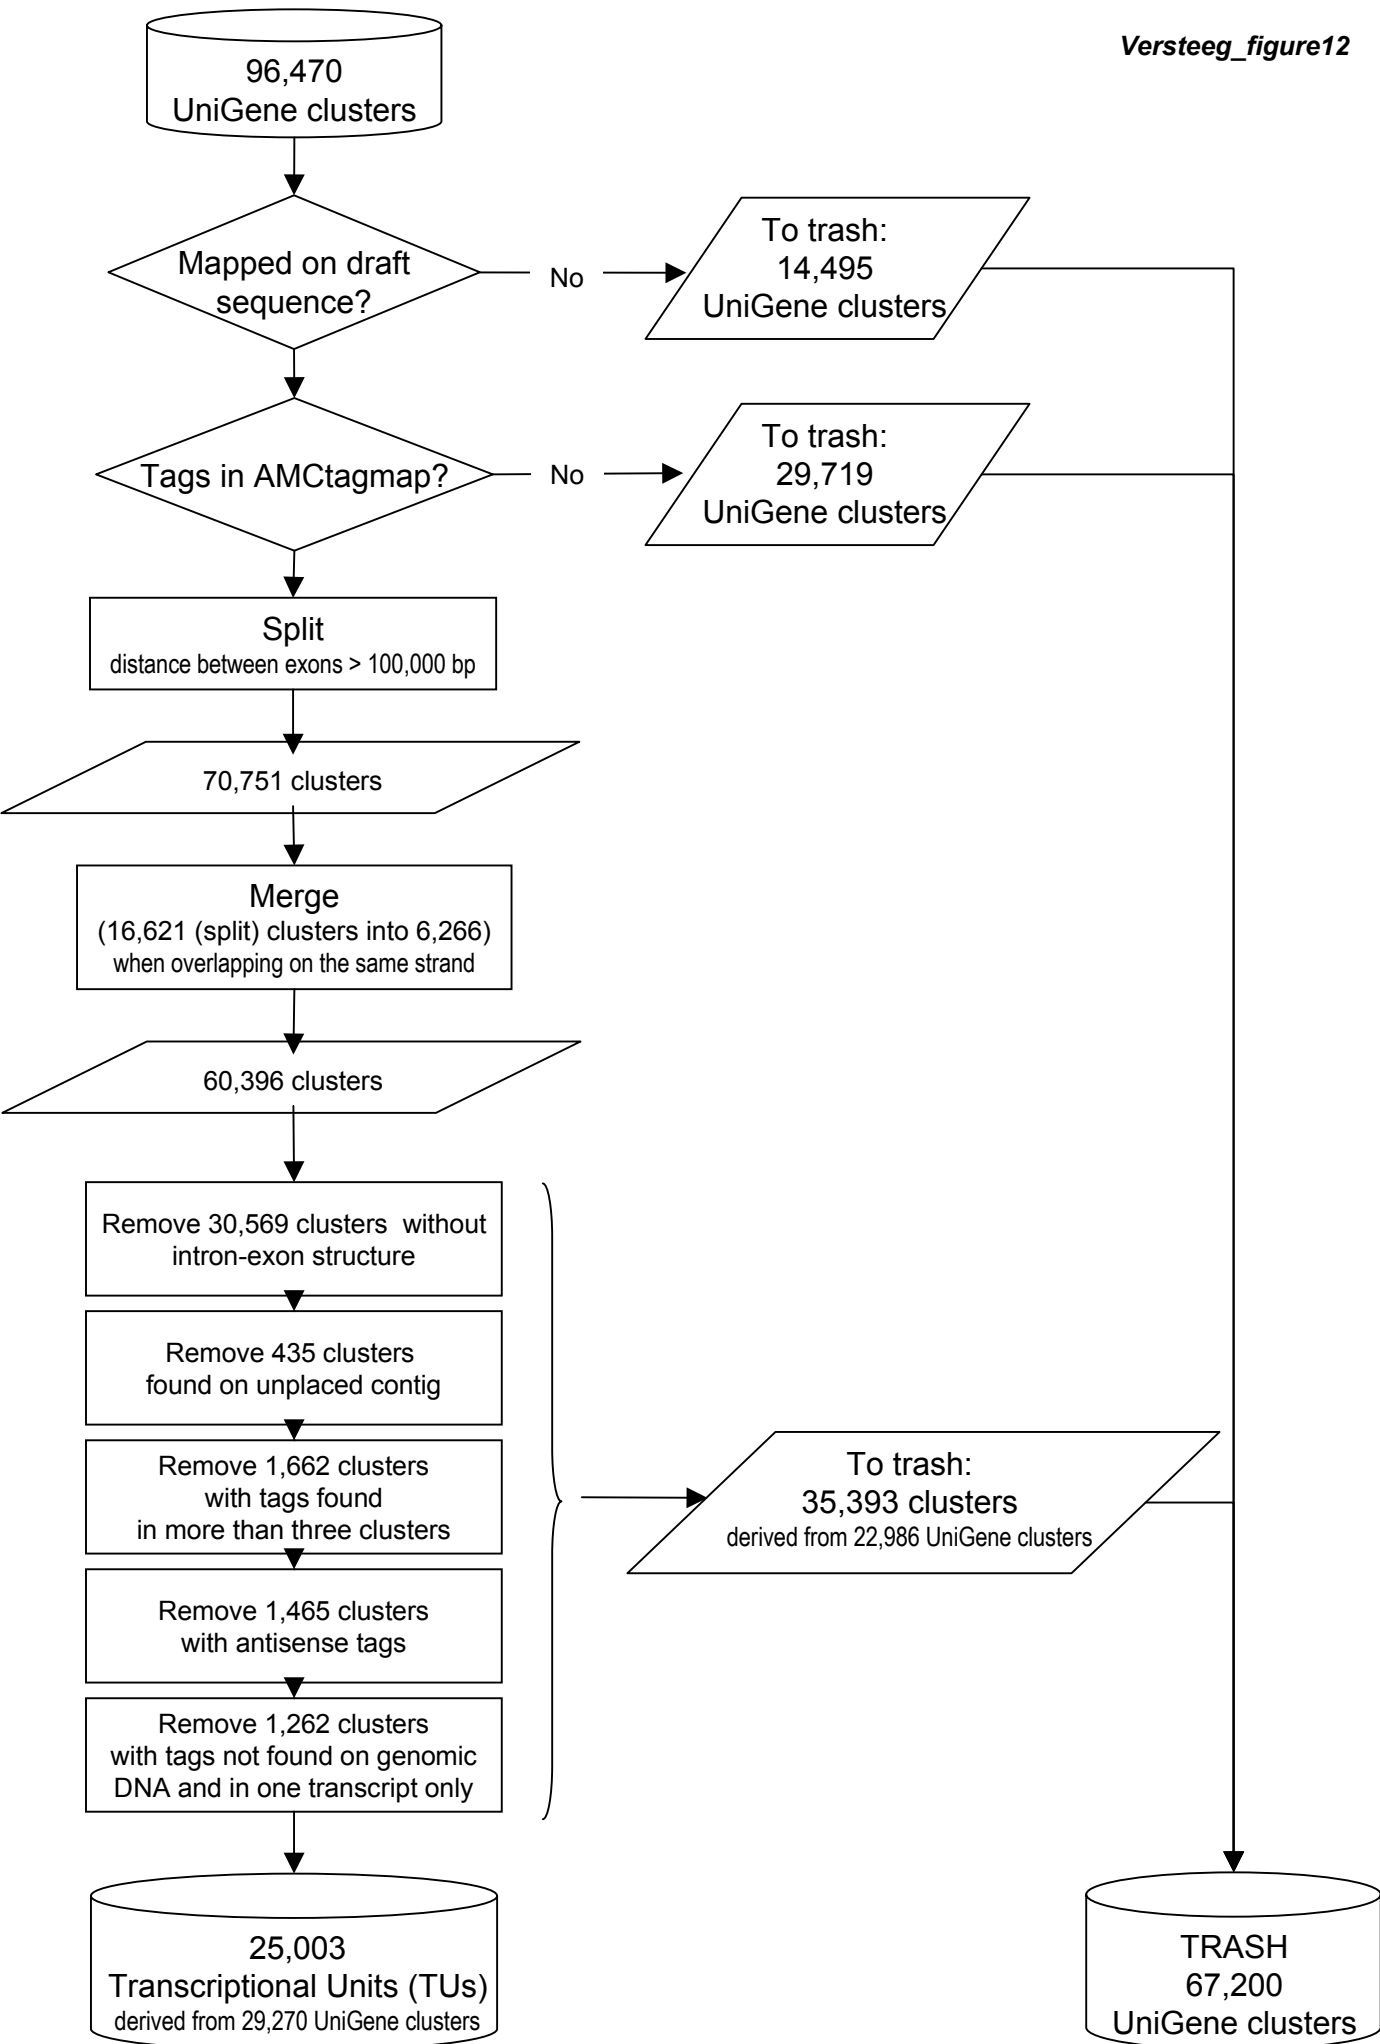

Supplement: Figure12.pdf [file Figure12.pdf]
